# Supplementary material for: Hepatitis Vaccination Adherence and Associated Factors: Descriptive Cross-sectional Study in Somalia
Source: Research Square preprint supplement (doi:10.21203/rs.3.rs-6654767/v1), 2025-05-29
Supplement: Supplementary file 1 [file 9f2b9cd2eb6870f4580f6796.docx]

# Supplementary File 1: Study Questionnaire – Hepatitis B Vaccination Adherence in Somalia

## Section A: Socio-Demographic Information

1. What is your age? ____

2. What is your gender? ☐ Male ☐ Female

3. What is your marital status? ☐ Single ☐ Married ☐ Divorced ☐ Widowed

4. What is your highest level of education completed? ☐ No formal education ☐ Primary ☐ Secondary ☐ University

5. What is your occupation? _______________________

6. What is your monthly income level? ☐ Less than $100 ☐ $100–$200 ☐ More than $200

7. Where do you reside? ☐ Urban ☐ Rural

## Section B: Screening Information

8. In what year did you participate in the hepatitis screening campaign?

☐ 2019 ☐ 2020 ☐ 2021 ☐ 2022 ☐ 2023 ☐ 2024

9. Were you screened for: ☐ Hepatitis B ☐ Hepatitis C ☐ Both

10. What was your screening result for Hepatitis B (HBV)? ☐ Positive ☐ Negative ☐ Don’t know

11. What was your screening result for Hepatitis C (HCV)? ☐ Positive ☐ Negative ☐ Don’t know

## Section C: Vaccination Status

12. Were you offered the hepatitis B vaccine after screening? ☐ Yes ☐ No

13. How many doses of the hepatitis B vaccine have you received? ☐ One ☐ Two ☐ All three ☐ None

14. Where did you receive your hepatitis B vaccine? ☐ Kalkaal Hospital ☐ University clinic ☐ Health campaign site ☐ Other: ____________

## Section D: Vaccination Adherence and Follow-Up

15. If you did not complete the second or third dose, what were the main reasons? (Select all that apply) ☐ Forgot ☐ Vaccine not available ☐ No reminder ☐ Felt it was not necessary ☐ Other: ____________

16. Did you receive any reminders or follow-up from health workers about your second and third doses? ☐ Yes ☐ No

17. Do you believe completing all three doses is important for full protection? ☐ Yes ☐ No ☐ Not sure

## Section E: Staff Observations (To be completed by data collectors)

18. Year of data entry: __________

19. Confirmed doses completed (by records): ☐ Dose 1 ☐ Dose 2 ☐ Dose 3

20. HBV test result: ☐ Positive ☐ Negative ☐ Unknown

21. HCV test result: ☐ Positive ☐ Negative ☐ Unknown
